# Supplementary material
Source: PubMed Central journal article supplement (PMC2786031)

**Supplementary Figures:**

**Figure 1: Generation and characterization of rabbit polyclonal SLIMMER antibodies.** A) The rabbit polyclonal SLIMMER-specific antibody was raised to amino acids 284 -297 in the unique C-terminal region of human SLIMMER (underlined). This rabbit polyclonal SLIMMER antibody has been designated  $\alpha$ -SLIMMER<sup>284-297</sup>. B-a) To test specificity of the SLIMMER antibody, COS-1 cells were transfected with constructs encoding HA -SLIMMER. Cell lysates were prepared in Tris Saline lysis buffer with 1% Triton and immunoblotted with either affinity purified anti-SLIMMER peptide antibody (right) or pre-immune sera (left). Migration of HA-SLIMMER is indicated by arrow. ~50 $\mu$ g of protein was loaded. B-b) C2C12 myoblasts were prepared in Triton X-100 lysis buffer and immunoblotted with either affinity purified anti-SLIMMER peptide antibody (right) or pre-immune sera (left). Migration of endogenous SLIMMER is indicated by arrow. ~50 $\mu$ g of protein was loaded.

**Figure 2: SLIMMER alters Siva-1-induced nuclear morphology in C2C12 myoblasts (from Figure 6).**

To confirm expression of HA- and GFP-tagged proteins in C2C12 myoblasts, duplicate samples of transfected C2C12 myoblasts were harvested for immunoblots, 24 hours post-transfection. Lysates were prepared in HEPES lysis buffer and immunoblotted with anti-HA, anti-GFP, or anti-Siva-1<sup>(82-94)</sup> antibody, or anti-actin and  $\beta$ -tubulin as indicated for protein loading control. Migration of HA- $\beta$ gal and HA-SLIMMER is indicated by arrows.

Supplementary Table 1: Oligonucleotides used in PCR amplification

| Construct                   | 5'-Oligo                           | 3'-Oligo                                                  | Reference Sequence                          |
|-----------------------------|------------------------------------|-----------------------------------------------------------|---------------------------------------------|
| pGBKT7- LIM ½               |                                    |                                                           | 84-743bp of                                 |
| 1+2+3 of FHL1/SLIMMER       | ggaattcatggcggagaagtttgactgc       | cggaattctcacttcttggccacaaagt                              | genebank entry<br>U29538                    |
| pGBKT7- LIM 3+4 of FHL1     | cggaattcatgcatgagaccaagttt         | cggaattctcacagcttttggcaca                                 | 543-923bp of<br>genebank entry<br>U29538    |
| pGBKT7- LIM 3+ER of SLIMMER | cggaattcatgcatgagaccaagttt         | gcgaattcttattatcacggagcatttt<br>tcagtggaagcagtagtctgtgcc  | 544-1056bp of<br>genebank entry<br>AF063002 |
| pGBKT7- 18aa+ER of SLIMMER  | cggaattcatgtacaagaactttgtg         | cgaattctcacggagcatttttgcagtg                              | 721-1056bp of<br>genebank entry<br>AF063002 |
| pGBKT7-KyoT2                | cggaattcatgctggagaagttcg           | gcgaattcttattatcacggagcattttt<br>gcagtggaagcagtagtctgtgcc | Full Length<br>(32)                         |
| pGEX-5x1-Siva-1             | ccttctagaacgcgtatgcccaagcggagctgcc | ccttctagaacgcgtttatcaggtctcgaacatgg                       | 70-597bp of<br>genebank entry<br>NM_006427  |
| pTrio12R-HEN                | cctgctagccaccatggtgagcaagggcgagg   | cctgctagcaggcctattaacgcgtagtccggcc<br>ggactgtacagc        | pEGFP-C2<br>(Clontech)                      |

# Supplementary Figure 1. Cottle et al

A

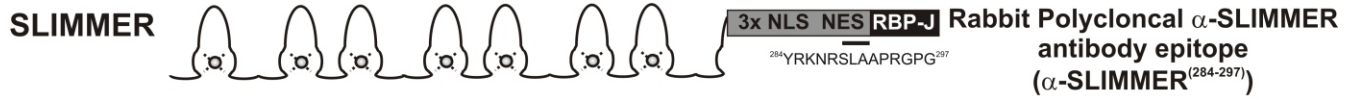

B-a) COS-1 cells

B-b) C2C12 Myoblasts

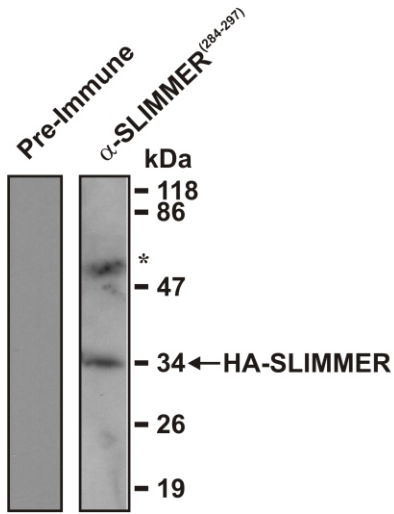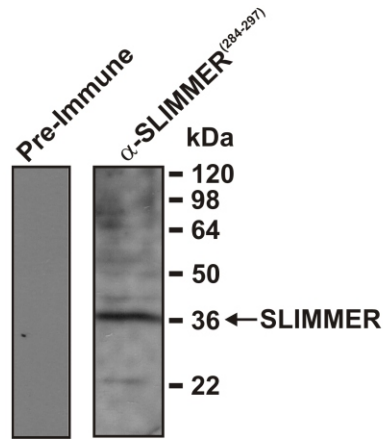

Supplementary Figure 2. Cottle et al

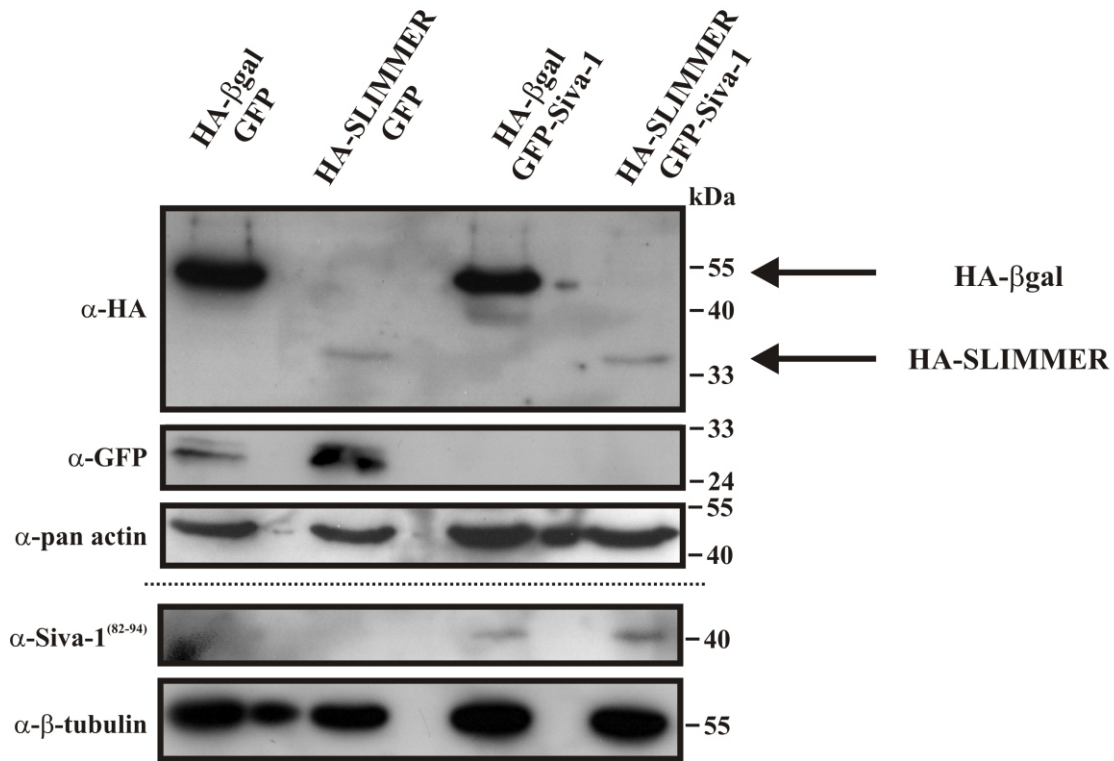

Supplement: supp_M109.036293_jbc.M109.036293-1.pdf [file supp_M109.036293_jbc.M109.036293-1.pdf]
